# Supplementary material for: Ag supraparticles with 3D hot spots to actively capture molecules for sensitive detection by surface enhanced Raman spectroscopy
Source: Royal Society of Chemistry journal article supplement (doi:10.1039/d3an02247a), 2024-01-01
Supplement: d3an02247a1.pdf [file d3an02247a1.pdf]

## Supporting information

### Ag supraparticles with 3D hotspots to actively capture molecules for surface enhanced Raman scattering sensitive detection

Mingrui Zhu,<sup>a,b</sup> Guoliang Zhou,<sup>a,b</sup> Ronglu Dong,<sup>b</sup> Pan Li,<sup>b\*</sup> Liangbao Yang<sup>b\*</sup>

a. University of Science & Technology of China, Anhui, Hefei 230026, China.

b. Anhui Province Key Laboratory of Medical Physics and Technology, Institute of Health and Medical Technology, Hefei Institutes of Physical Science, Chinese Academy of Sciences, Hefei 230031, China.

Figure S1: Characterization of Ag nanoparticles.....S1

Figure S2: The shrinkage process of Cit Au NPs colloidal.....S1

Figure S3: The shrinkage process of PVP Au NPs colloidal.....S2

Figure S4: The shrinkage process when organic phase was chloroform.....S2

Figure S5: The EDS diagram of multilayer structures and Ag supraparticles.....S2

Figure S6: SERS performance measurements of different molecules on 3D supraparticles.....S2

Table S1: Characteristics, chemical bonds and vibration modes of molecules.....S3

References.....S3

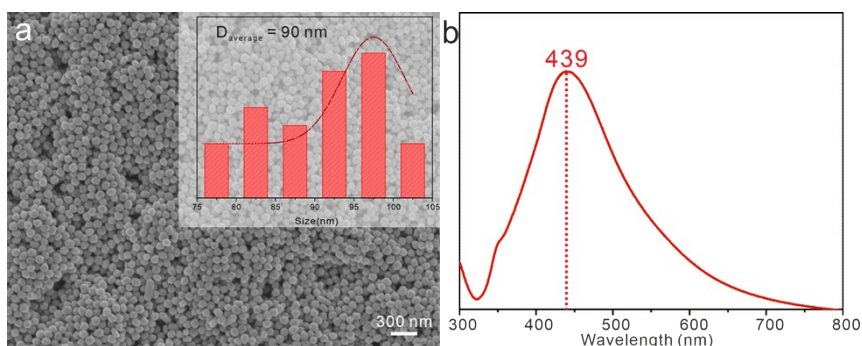

**Figure S1.** Characterization of Ag nanoparticles. (a) SEM characterization and size distribution of Ag nanoparticles. (b) UV-Vis spectra of Ag nanoparticles.

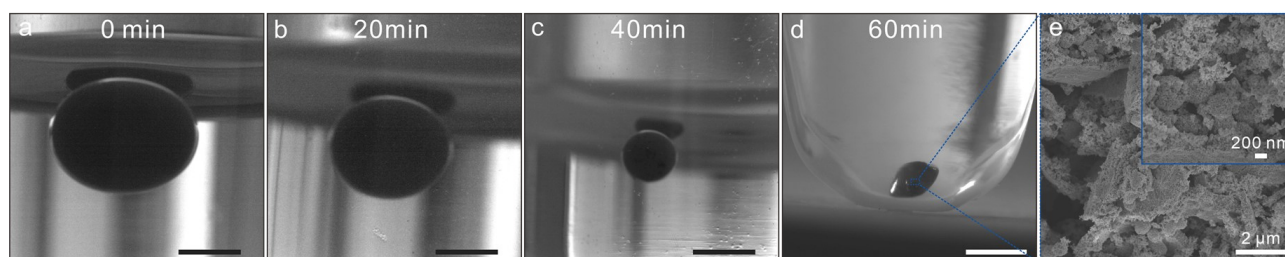

**Figure S2.** The shrinkage process of Cit Au NPs colloidal. (a-d) A high-speed camera was used to observe the shrinkage process of the sodium citrate-modified Au NPs colloids in the organic phase under ultrasound conditions (the scale bar is 2 mm). (e) SEM image of the final morphology formed from sodium citrate-modified Au NPs.

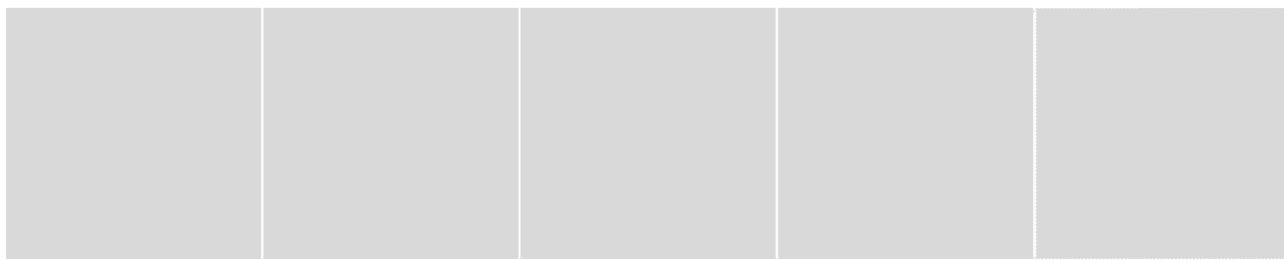

**Figure S3.** The shrinkage process of PVP Au NPs colloidal. (a-d) A high-speed camera was used to observe the shrinkage process of PVP-modified Au NPs colloids in the organic phase under ultrasound conditions (the scale bar is 2 mm). (e) SEM image of the final morphology formed from PVP-modified Au NPs.

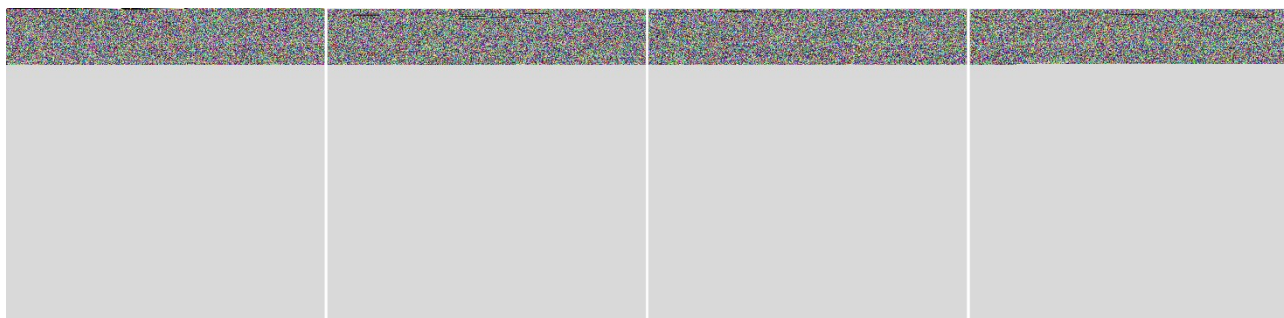

**Figure S4.** The shrinkage process when organic phase was chloroform. (a-d) The shrinkage process of citrate stabilized Ag colloids under ultrasonic conditions was observed with a high-speed camera using chloroform as organic phase (the scale bar is 2 mm).

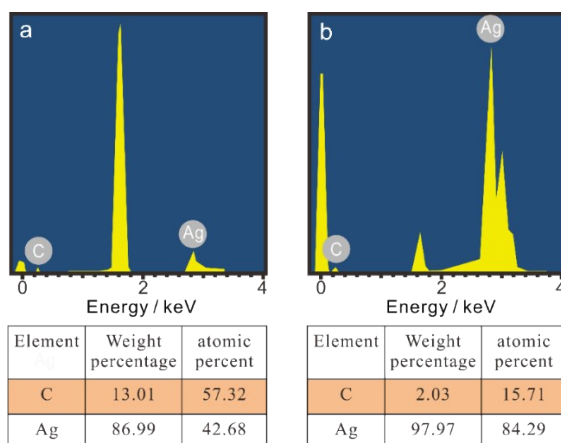

**Figure S5.** Comparison of surface EDS spectrometry analysis of supraparticles and sol after natural evaporation (a) EDS diagram after natural drying. (b) EDS diagram of 3D supraparticle.

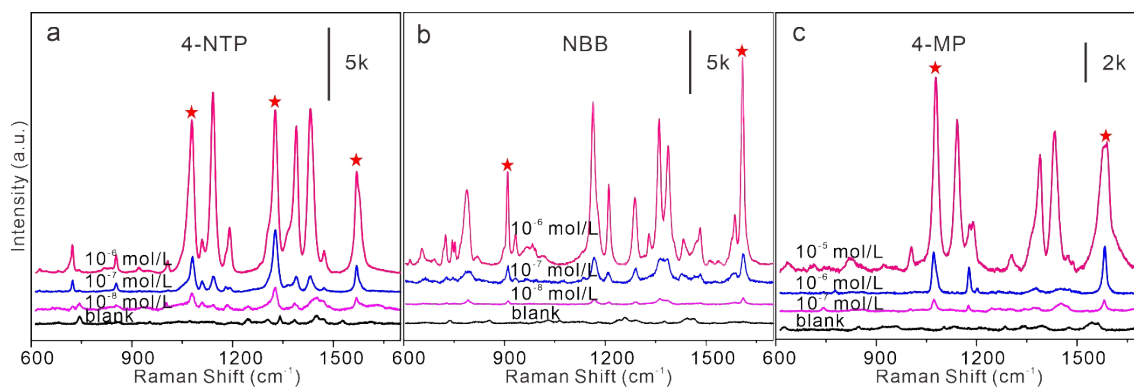

**Figure S6.** SERS performance measurements of different molecules on 3D supraparticles (a) 4-NTP (4-

Nitrothiophenol); (b) NBB (2-Nitrobenzyl bromide); (c) 4-MP (4-Mercaptohenol).

**Table S1.** Characteristics, chemical bonds and vibration modes of molecules

| Molecule            | Characteristic                                                                           | Chemical bond         | Vibrational mode                        |
|---------------------|------------------------------------------------------------------------------------------|-----------------------|-----------------------------------------|
| MG <sup>1</sup>     | High toxicity and high residue,<br>Prohibited drugs for aquaculture                      | 1619 cm <sup>-1</sup> | Ring C-C stretching                     |
|                     |                                                                                          | 1298 cm <sup>-1</sup> |                                         |
|                     |                                                                                          | 1396 cm <sup>-1</sup> | N-phenyl stretching                     |
|                     |                                                                                          | 773 cm <sup>-1</sup>  | C-H out-of-plane bending vibration      |
| MB <sup>2</sup>     | Antidotes for cyanide and<br>oxidation-reduction indicators                              | 1642 cm <sup>-1</sup> | Ring C-C stretching vibration           |
|                     |                                                                                          | 1420 cm <sup>-1</sup> | C-N stretching                          |
|                     |                                                                                          | 1357 cm <sup>-1</sup> |                                         |
|                     |                                                                                          | 1184 cm <sup>-1</sup> | C-H bending vibration                   |
|                     |                                                                                          | 664 cm <sup>-1</sup>  | C-C-C deformation in plane              |
| 6-MP <sup>3</sup>   | Antitumor drugs                                                                          | 1307 cm <sup>-1</sup> | N-C stretching vibration                |
|                     |                                                                                          | 1110 cm <sup>-1</sup> | S-H stretching vibration                |
|                     |                                                                                          | 814 cm <sup>-1</sup>  | C-S-H deformation vibration             |
| 4-NTP <sup>4</sup>  | Probe molecules for studying<br>electrochemical and photochemical<br>reaction mechanisms | 1078 cm <sup>-1</sup> | C-H bending vibration                   |
|                     |                                                                                          | 1327 cm <sup>-1</sup> | NO <sub>2</sub> symmetric stretching    |
|                     |                                                                                          | 1569 cm <sup>-1</sup> | C=C stretching vibration                |
| NBB <sup>5</sup>    | Bactericidal, antifungal and anti-<br>inflammatory                                       | 908 cm <sup>-1</sup>  | Ring C-C respiration                    |
|                     |                                                                                          | 1608 cm <sup>-1</sup> | NO <sub>2</sub> Antisymmetric vibration |
| 4-MP <sup>6-7</sup> | Antibacterial, mold inhibiting and<br>antiseptic                                         | 1078 cm <sup>-1</sup> | C-C stretching                          |
|                     |                                                                                          | 1590 cm <sup>-1</sup> | Ring stretching vibration               |

### References in the supporting information

- Zhou, B. B.; Mao, M.; Cao, X. M.; Ge, M. H.; Tang, X. H.; Li, S. F.; Lin, D. Y.; Yang, L. B.; Liu, J. H., Amphiphilic Functionalized Acupuncture Needle as SERS Sensor for In Situ Multiphase Detection. *Anal Chem* **2018**, *90* (6), 3826-3832.
- Hussain, S.; Nisar, A.; Karim, S.; Yu, Y. L.; Liu, Y. G.; Sun, H. Y.; Zafar, A.; Hussain, S. Z.; Ahmad, M., Tuning the SERS Capabilities of ZnO Nanowire Arrays Functionalized with Au Quantum Dots for Highly Sensitive Detection of Methylene Blue. *Chemistryselect* **2023**, *8* (19).
- Pannico, M.; Musto, P., SERS spectroscopy for the therapeutic drug monitoring of the anticancer drug 6-Mercaptopurine: Molecular and kinetic studies. *Appl Surf Sci* **2021**, *539*.

4. Sarhan, R. M.; Koopman, W.; Pudell, J.; Stete, F.; Rössle, M.; Herzog, M.; Schmitt, C. N. Z.; Liebig, F.; Koetz, J.; Bargheer, M., Scaling Up Nanoplasmon Catalysis: The Role of Heat Dissipation. *J Phys Chem C* **2019**, *123* (14), 9352-9357.
5. Wang, Y. H.; Du, Y.; Huang, X.; Wu, X. X.; Zhang, Y. X.; Yang, S.; Chi, Y. G. R., Carbene-Catalyzed Reductive Coupling of Nitrobenzyl Bromide and Nitroalkene via the Single-Electron-Transfer (SET) Process and Formal 1,4-Addition. *Org Lett* **2017**, *19* (3), 632-635.
6. Wang, W. K.; Zhang, L. M.; Li, L.; Tian, Y., A Single Nanoprobe for Ratiometric Imaging and Biosensing of Hypochlorite and Glutathione in Live Cells Using Surface-Enhanced Raman Scattering. *Anal Chem* **2016**, *88* (19), 9518-9523.
7. Zhao, L. Z.; Hu, Y. L.; Li, G. K.; Zou, S. Y.; Ling, L. S., Chemical-Chemical Redox Cycle Signal Amplification Strategy Combined with Dual Ratiometric Immunoassay for Surface-Enhanced Raman Spectroscopic Detection of Cardiac Troponin I. *Anal Chem* **2023**, *95* (45), 16677-16682.
